# Supplementary material
Source: Springer Nature journal article supplement (https://www.springermedizin.de/resource/supplementary/12958_2008_472_MOESM4_ESM.pdf/9567982)

Day 15

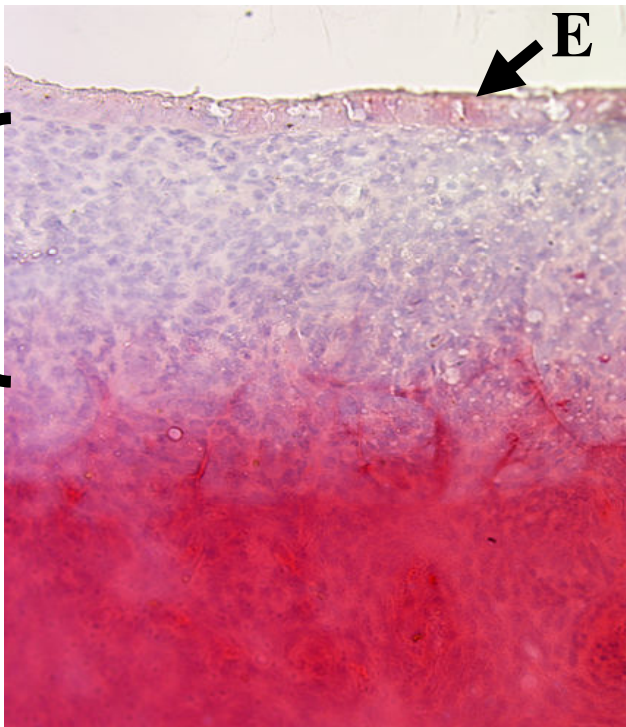

Stratum  
compactum

Day 21

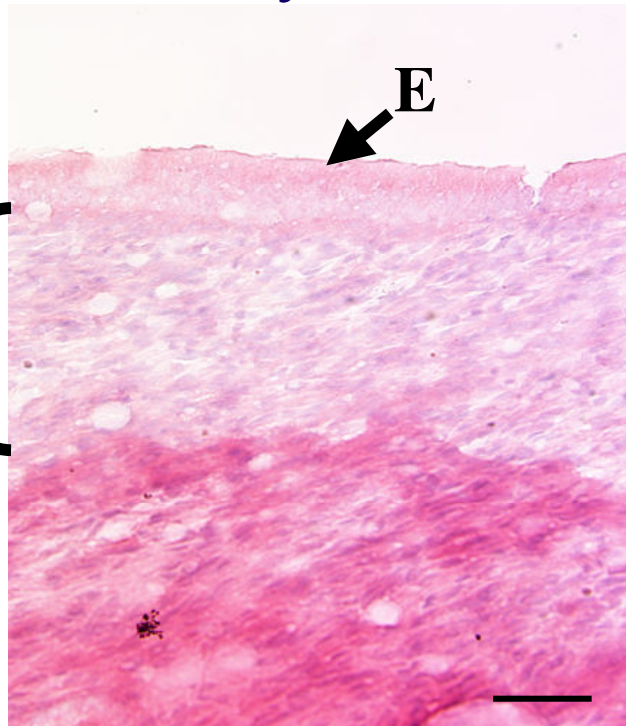

Supplement: MOESM4 [file 9567982]
